# Supplementary material
Source: PubMed Central journal article supplement (PMC7214773)

## SUPPLEMENTAL FIGURES

### Figure S1. Proliferating OPCs have Uniform Microtubule Polarity, Related to Figure 1

- (A) Image of bipolar OPC proliferated for 2 days in culture in the presence of PDGF and expressing EB3-EGFP.
- (B) Kymograph of proliferating OPC process expressing EB3-EGFP.
- (C) Proliferating OPCs contain microtubules that mostly grow in the anterograde direction away from the cell body (97%) and few that grow in the retrograde direction (3%).  $n = 3$  cells.
- (D) EM images from P14 mouse spinal cord with the putative oligodendrocyte process pseudocolored in green. This process contains many ribosomes (small dots), which is characteristic of oligodendrocytes, and differs in appearance from a nearby axon in transverse section (lower right).

### Figure S2. Motile Golgi Outposts Can Give Rise to Microtubules, Related to Figures 1 and 2

- (A) Micrographs from dual-color live-cell imaging movies of cells co-expressing both EB3-EGFP and ManII-tdTomato.
- (B) Kymographs and colocalization analysis.
- (C) Quantification of the percentage of Golgi outposts that give rise to EB3-labeled growing microtubules at DIV3 ( $40.6 \pm 6.5\%$ ) and DIV5 ( $32.0 \pm 5.3\%$ ).
- (D) Probability analysis comparing actual rates of EB3-positive puncta arising from ManII+ puncta versus probability based on chance. Based on the binomial distribution, the average probability of these outcomes is 0.133.
- (E) ManII+ Golgi outposts binned by how many EB3 events originated from them and plotted by the net speeds of each Golgi outpost. ManII+ puncta that give rise to EB3 events have average speed of  $0.013 \pm 0.006 \mu\text{m/s}$  while those that do not have average speed of  $0.056 \pm 0.011 \mu\text{m/s}$ .  $n = 3$  biological replicates, 12 cells, 94 ManII+ Golgi.
- (F) Enlarged view of super-resolution image of a DIV4 rat oligodendrocyte (from Figure 2D) stained against tubulin.

### Figure S3. $\gamma$ -Tubulin Staining and Mass Spectrometry, Related to Figure 3

- (A) Chart of antibodies used in immunostaining experiments.
- (B) Max projection of GTU-88 staining of DIV3 rat oligodendrocyte. Arrowhead points to centrosome staining identified near the nucleus in separate z-stack from TPPP puncta.
- (C) Max projection of TU-30 staining of DIV3 rat oligodendrocyte. Arrowhead points to centrosome staining identified near the nucleus in separate z-stack from TPPP puncta.
- (D) Chart of spectral counts for all tubulins detected in mass spectrometry experiments in Figure 3.

### Figure S4. EB3-Loaded Beads Do Not Nucleate Microtubules, Related to Figure 4

- (A) On-bead microtubule nucleation assay with EB3-loaded beads with 1 $\mu$ M EB3, 15 $\mu$ M Tubulin, 1 mM GTP.
- (B) TPPP-EGFP puncta from oligodendrocyte lysate concentrates rhodamine-labeled tubulin in the absence of GTP.

**Figure S5. TPPP Knockdown in Spinal Cord Oligodendrocytes, Related to Figure 5**

- (A) Immunopanned rat oligodendrocytes were electroporated with siRNA directed against TPPP and lysed. Western blot of cell lysates cultured for 3 days or 5 days in differentiation media shows no immunoreactivity using TPPP antibody.
- (B) Micrographs of rat spinal cord oligodendrocytes electroporated with TPPP siRNA or a sequence-specific scrambled control and differentiated DIV3, then stained with an antibody against tubulin.
- (C) Micrographs of rat cortex oligodendrocytes electroporated with EB3-GFP and TPPP siRNA or a sequence-specific scrambled control and differentiated DIV3.
- (D) Sholl analysis of rat spinal cord oligodendrocytes from Figure S5B. n = 3 biological replicates, 11–15 cells.
- (E) Sholl analysis of rat cortex oligodendrocytes from Figure S5C. n = 2 biological replicates, 5 cells.
- (F) Representative confocal micrographs of DIV4 oligodendrocytes cultured from WT or TPPP KO mice that are high expressers of MBP protein.
- (G) Normalized MBP protein intensity for all DIV4 oligodendrocytes cultured from WT or TPPP KO mice. Data represents both high and low expressers of MBP protein. n = 19 – 23 cells, 3 biological replicates from 3 mice per genotype.

**Figure S6. Oligodendrocyte Microfiber Cultures, Related to Figure 6**

- (A) Brightfield image of DIV9 rat oligodendrocytes cultured on 3D microfibers. Arrowheads point to cell bodies.
- (B) Enlarged and rotated confocal micrographs acquired at 100x (from Figure 6B). WT DIV14 mouse oligodendrocyte cultured on 3D microfibers at 100x. Arrowhead point to cell body.
- (C) Confocal micrographs acquired at 100x of DIV14 oligodendrocytes from WT or TPPP KO mice cultured on 3D microfibers. Arrowhead point to cell body. Arrows point to MBP bulbous hyperintensities.

**Figure S7. TPPP Knockout Mouse and Single-Cell RNA-seq, Related to Figure 7**

- (A) Map of TPPP knockout mouse obtained from KOMP. We obtained heterozygous sperm for the VG12652 tm1.1 allele, in which the neomycin cassette has already been removed.
- (B) Immunohistochemistry staining of TPPP knockout mouse brain using anti-TPPP antibody (green) and DAPI (blue).
- (C) Neurofilament staining of TPPP knockout mouse brain.
- (D) Single-cell RNA-seq tSNE graphs of TPPP expression in brain non-myeloid cells from adult mice, downloaded from the Tabula Muris database.
- (E) Violin plots and table indicating TPPP expression levels in different cell types.

(F) Single-cell RNA-seq tSNE and bar graphs of TPPP expression in the dentate gyrus of the hippocampus from mice of different ages, downloaded from the Linnarson Lab database. In addition to expression in oligodendrocytes, TPPP is also expressed in a specific subpopulation of CA3 pyramidal neurons.

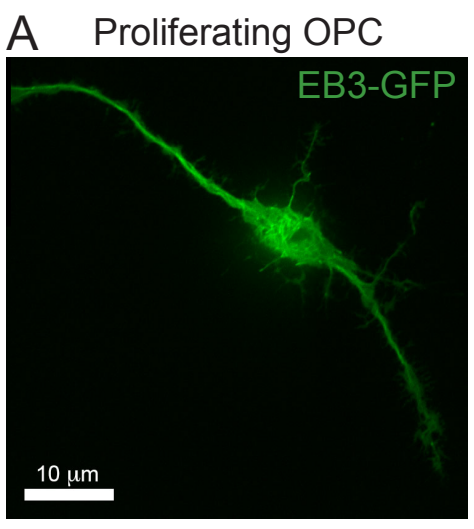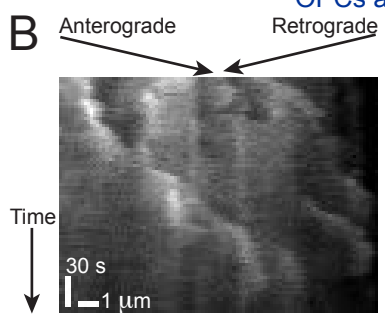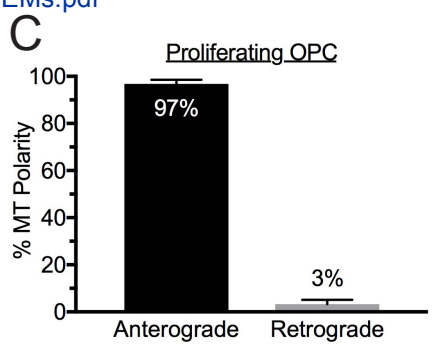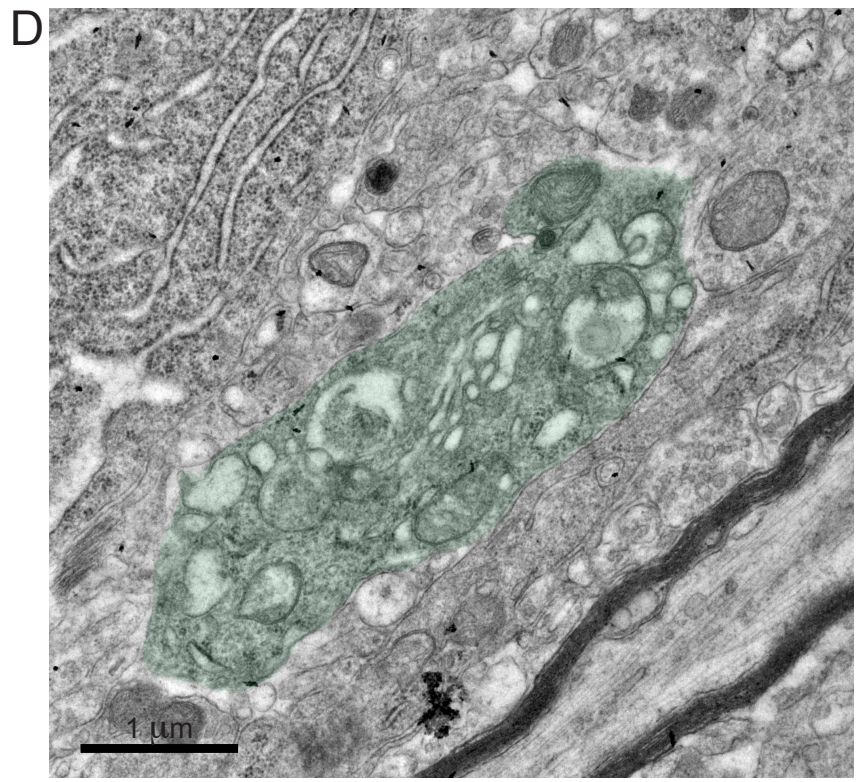





**A** 1 $\mu$ M EB3, 15 $\mu$ M Tubulin, +GTP

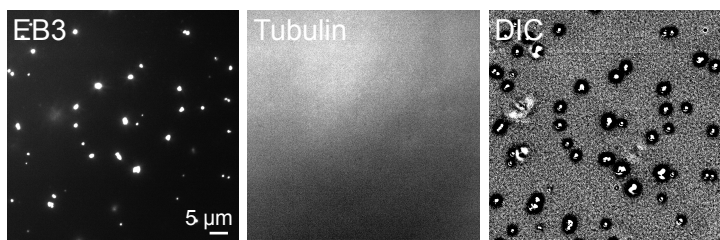

**B** Oligo. Lysate, Tubulin, No GTP

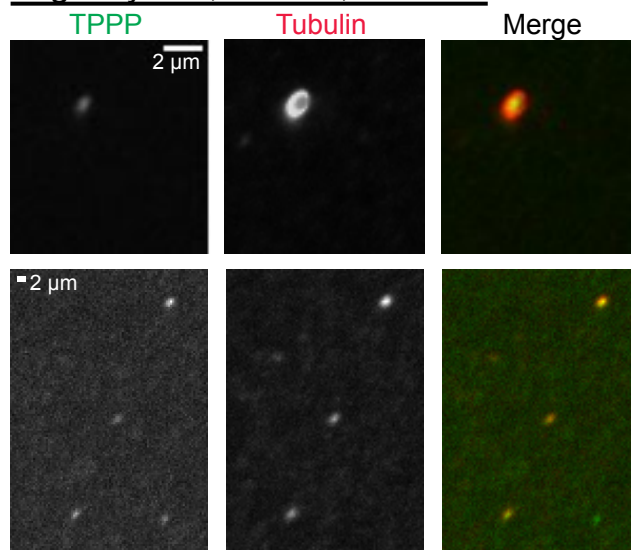

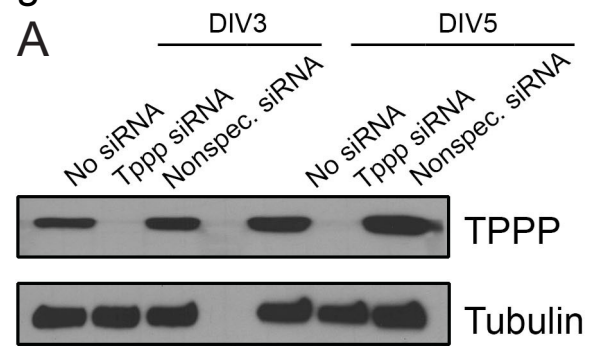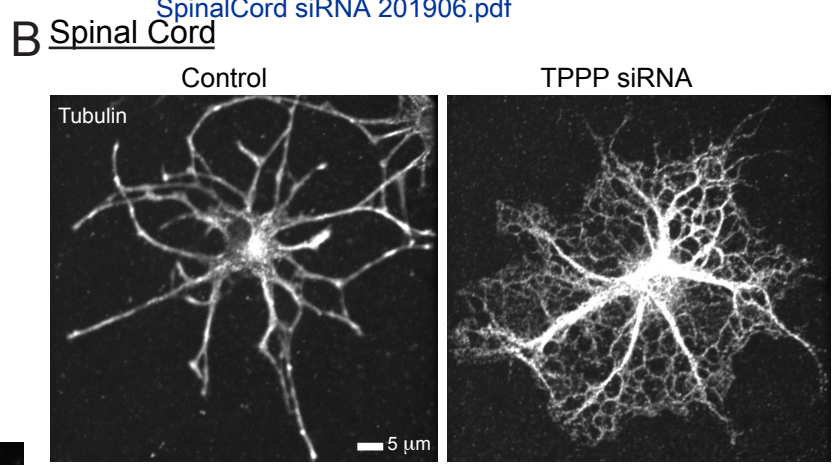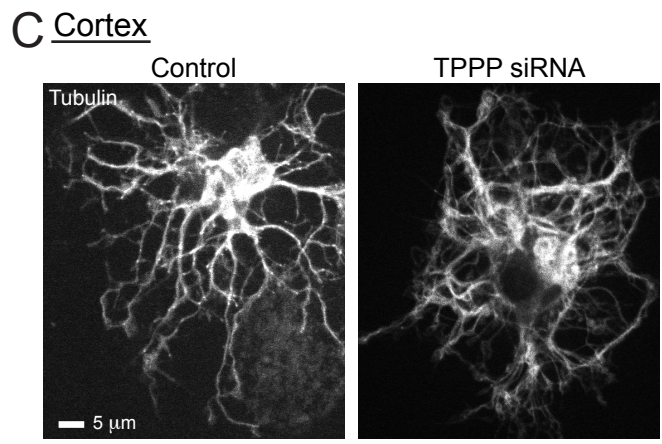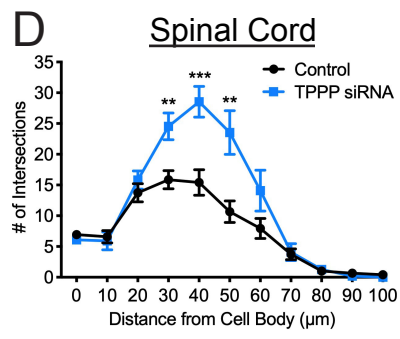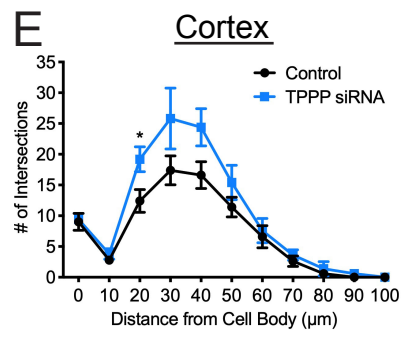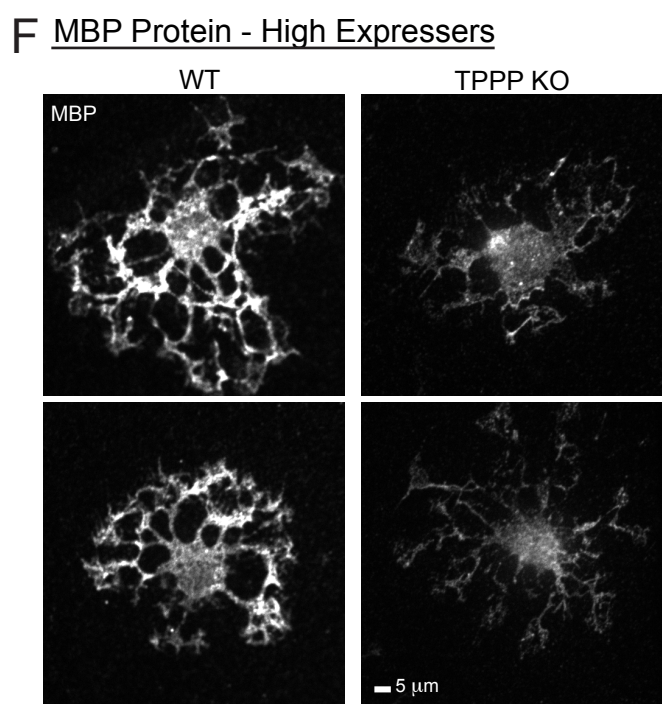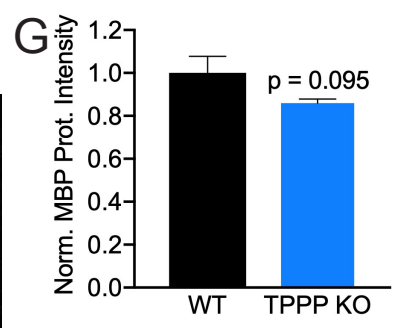



### A DIV9 Rat Oligodendrocytes

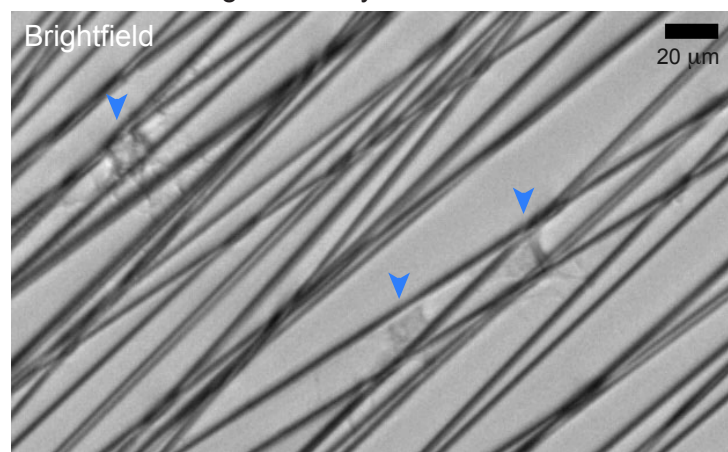

### B

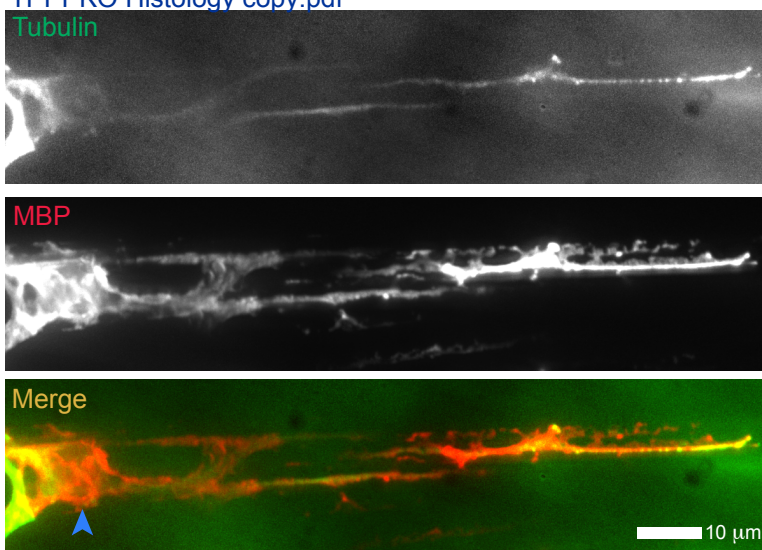

### C

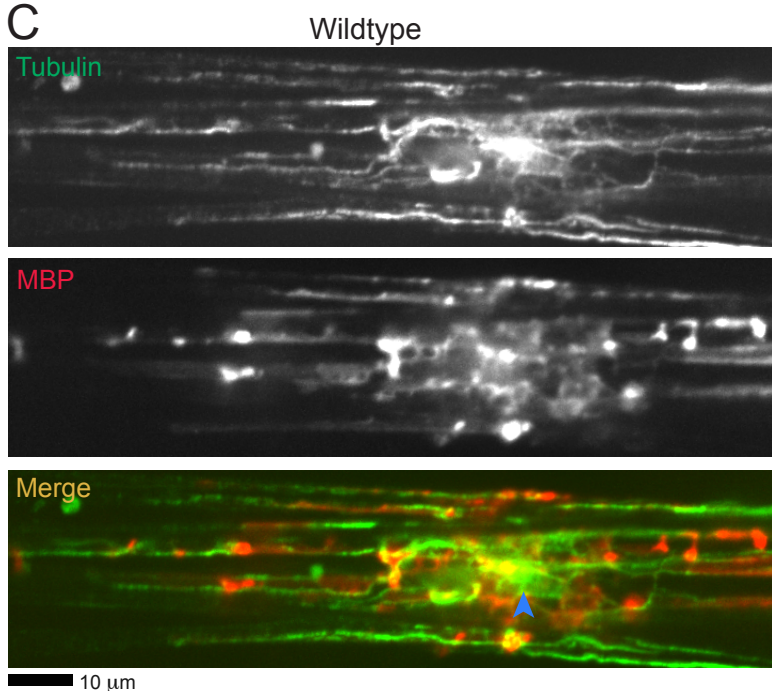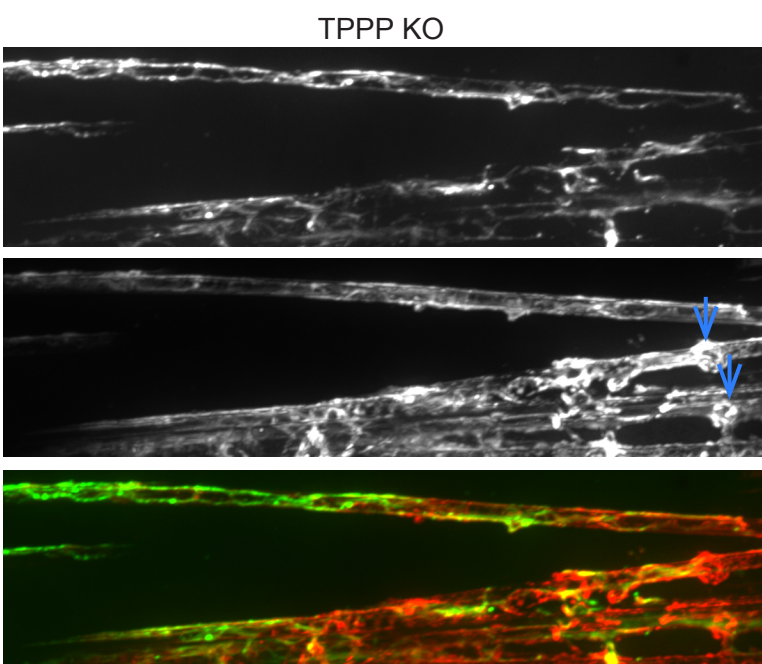

Figure S7

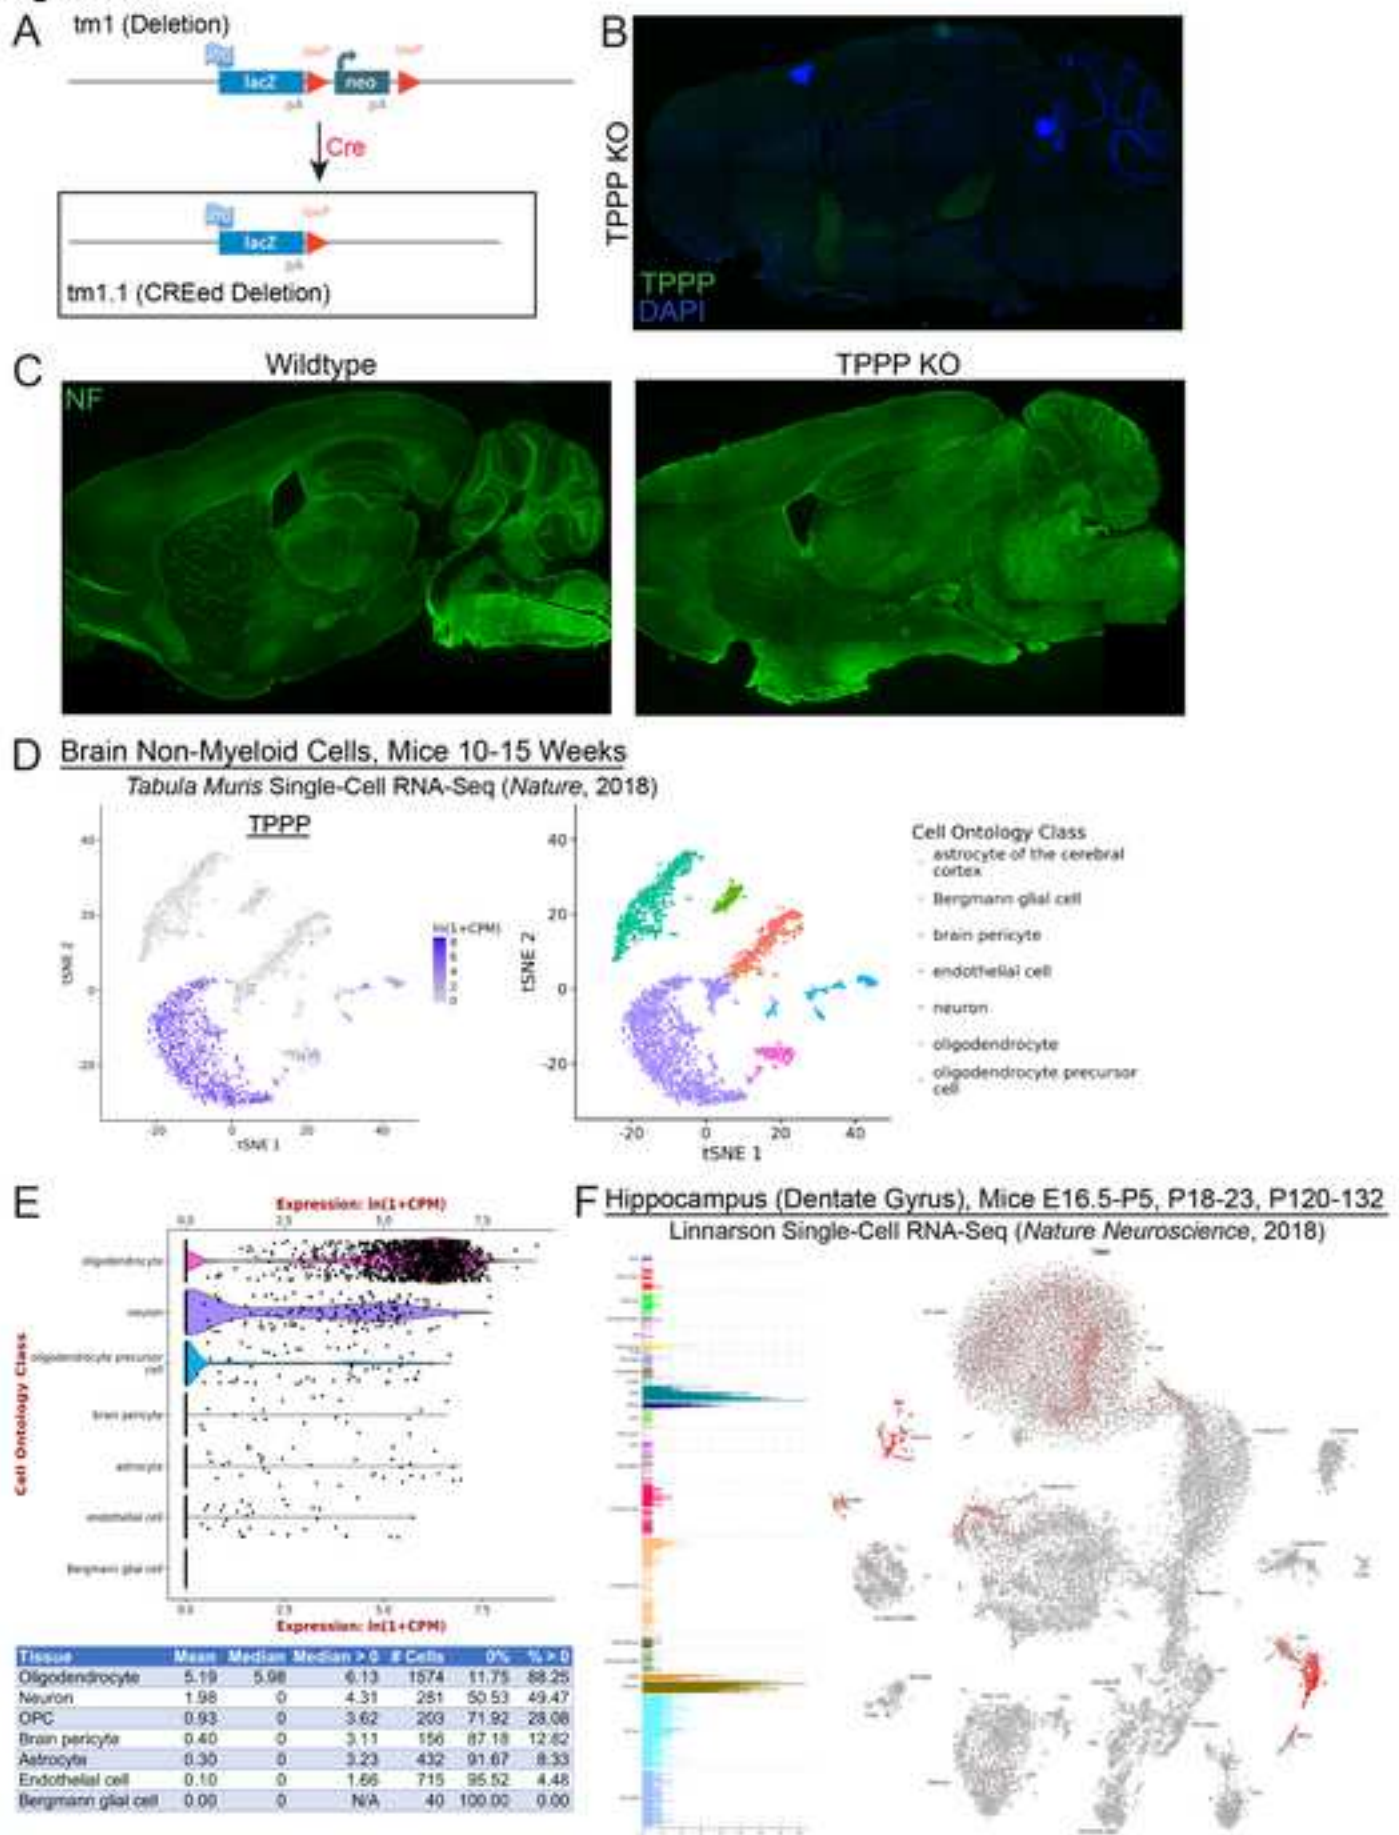

Supplement: NIHMS1573914-supplement-1.pdf [file NIHMS1573914-supplement-1.pdf]
